# Supplementary material
Source: PubMed Central journal article supplement (PMC5530582)
Supplement: NIHMS871374-supplement-2.pdf [file NIHMS871374-supplement-2.pdf]

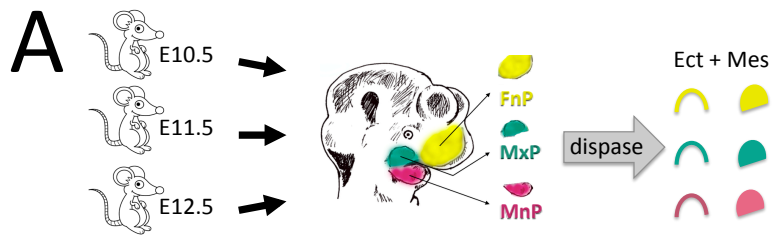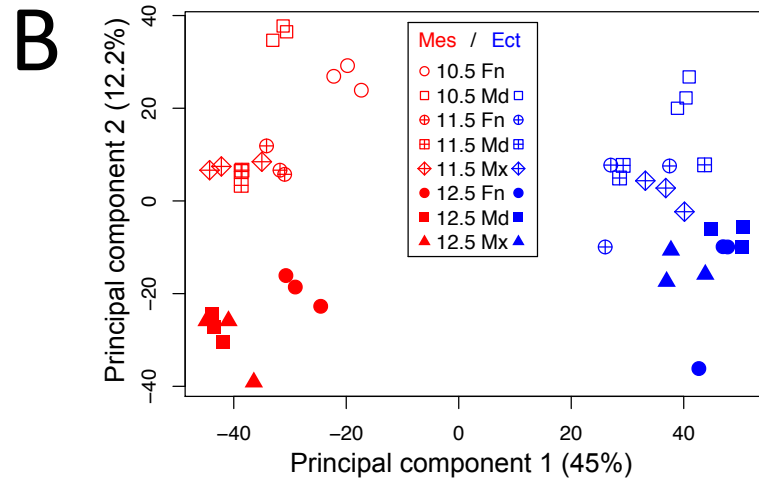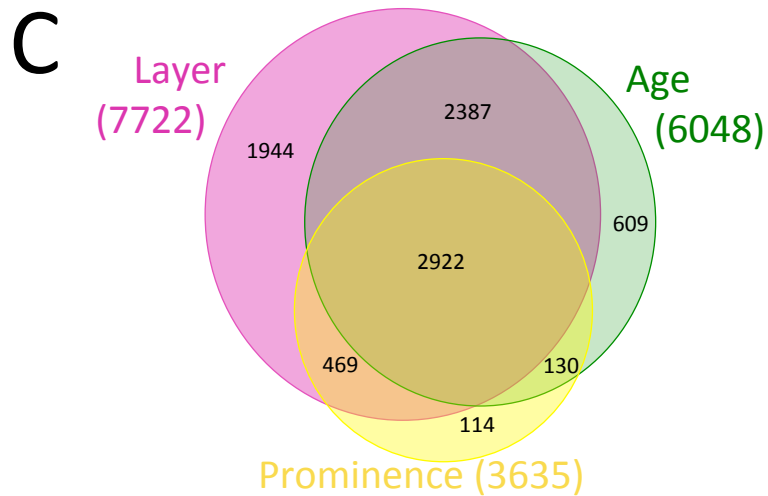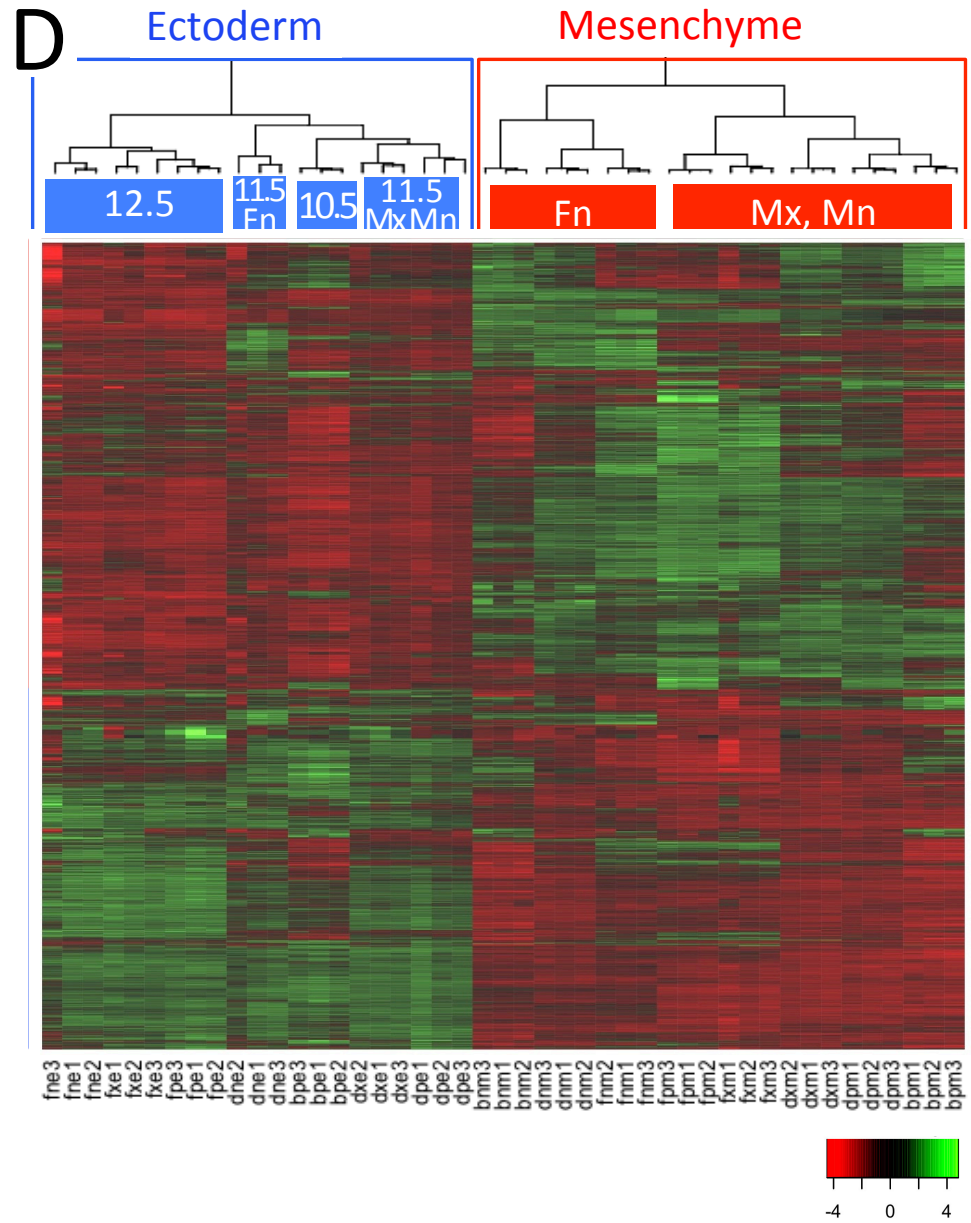

Figure 1

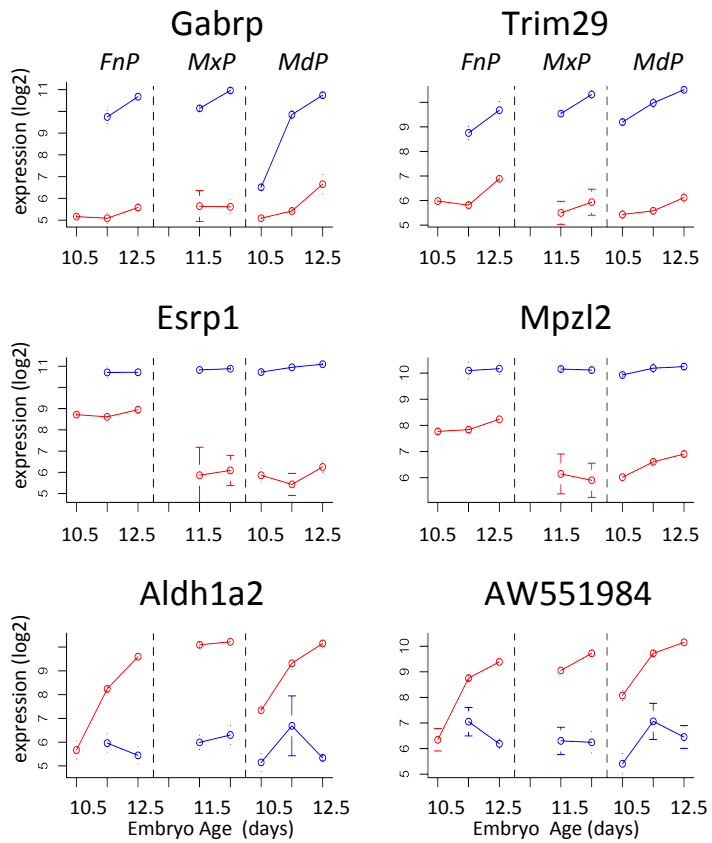

Expression levels

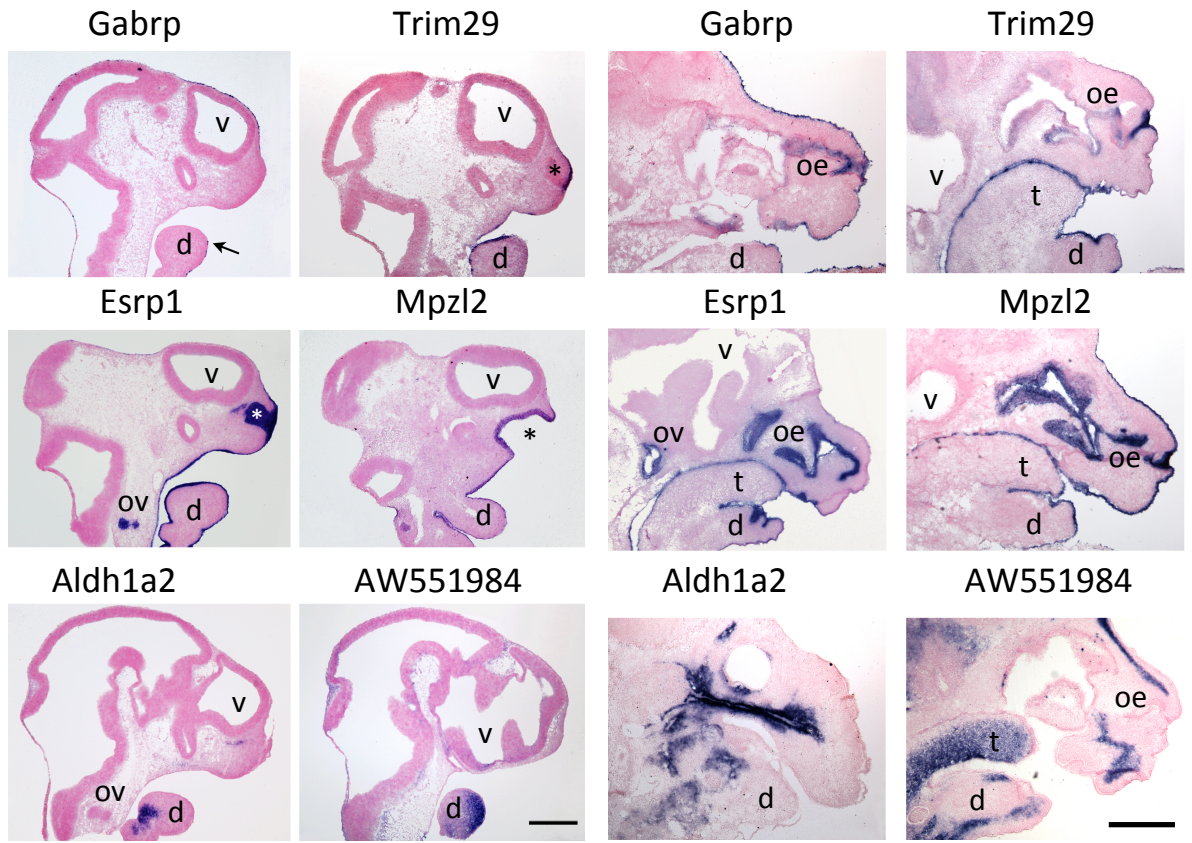

E10.5 *in situ*

E12.5 *in situ*

Figure 2

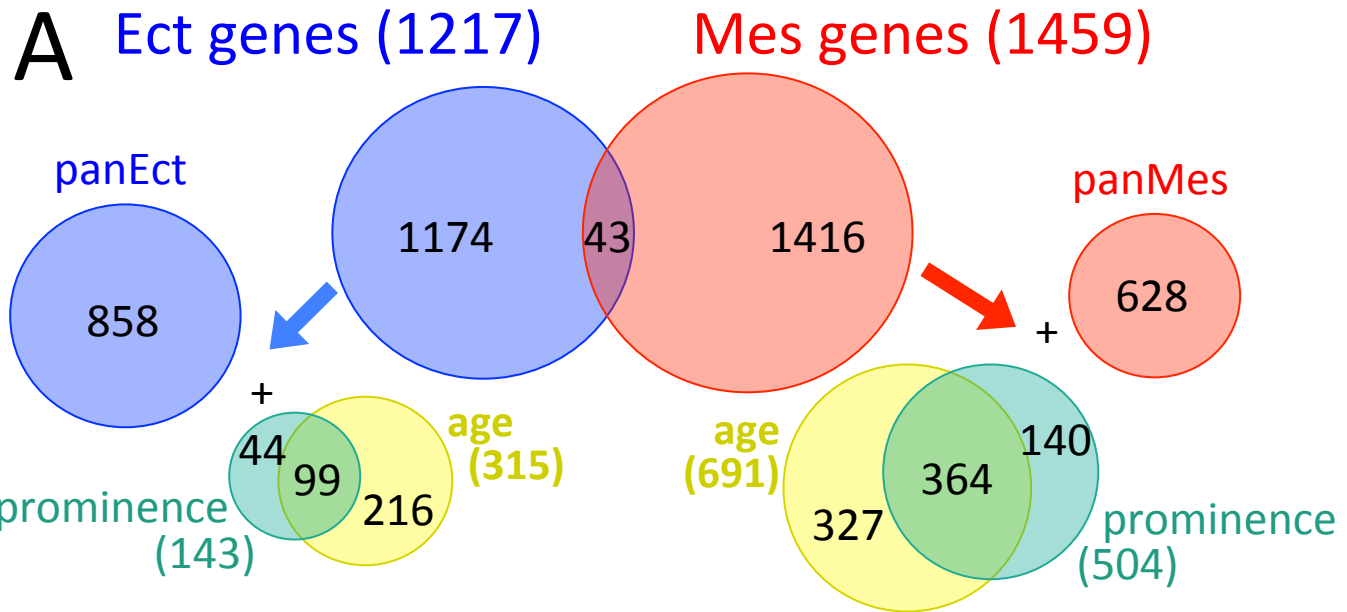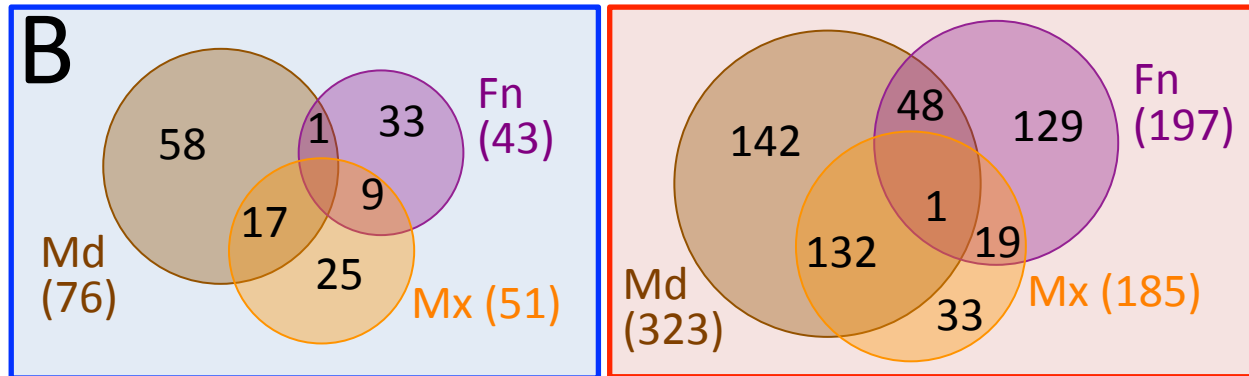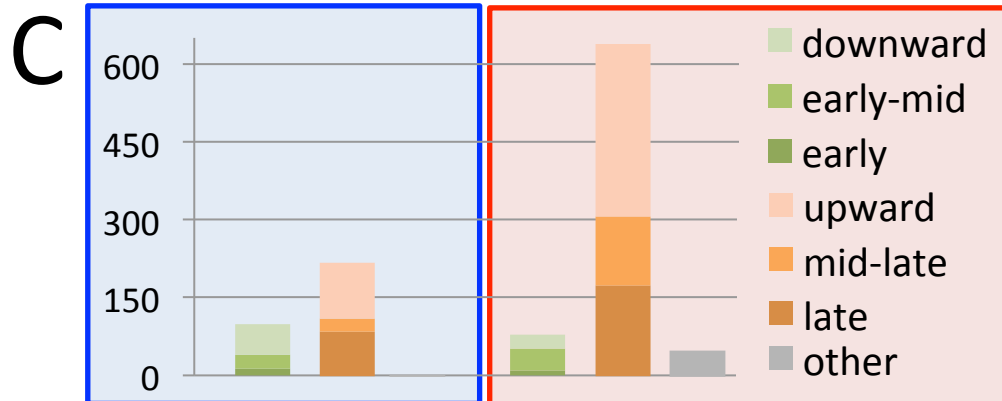

Figure 3

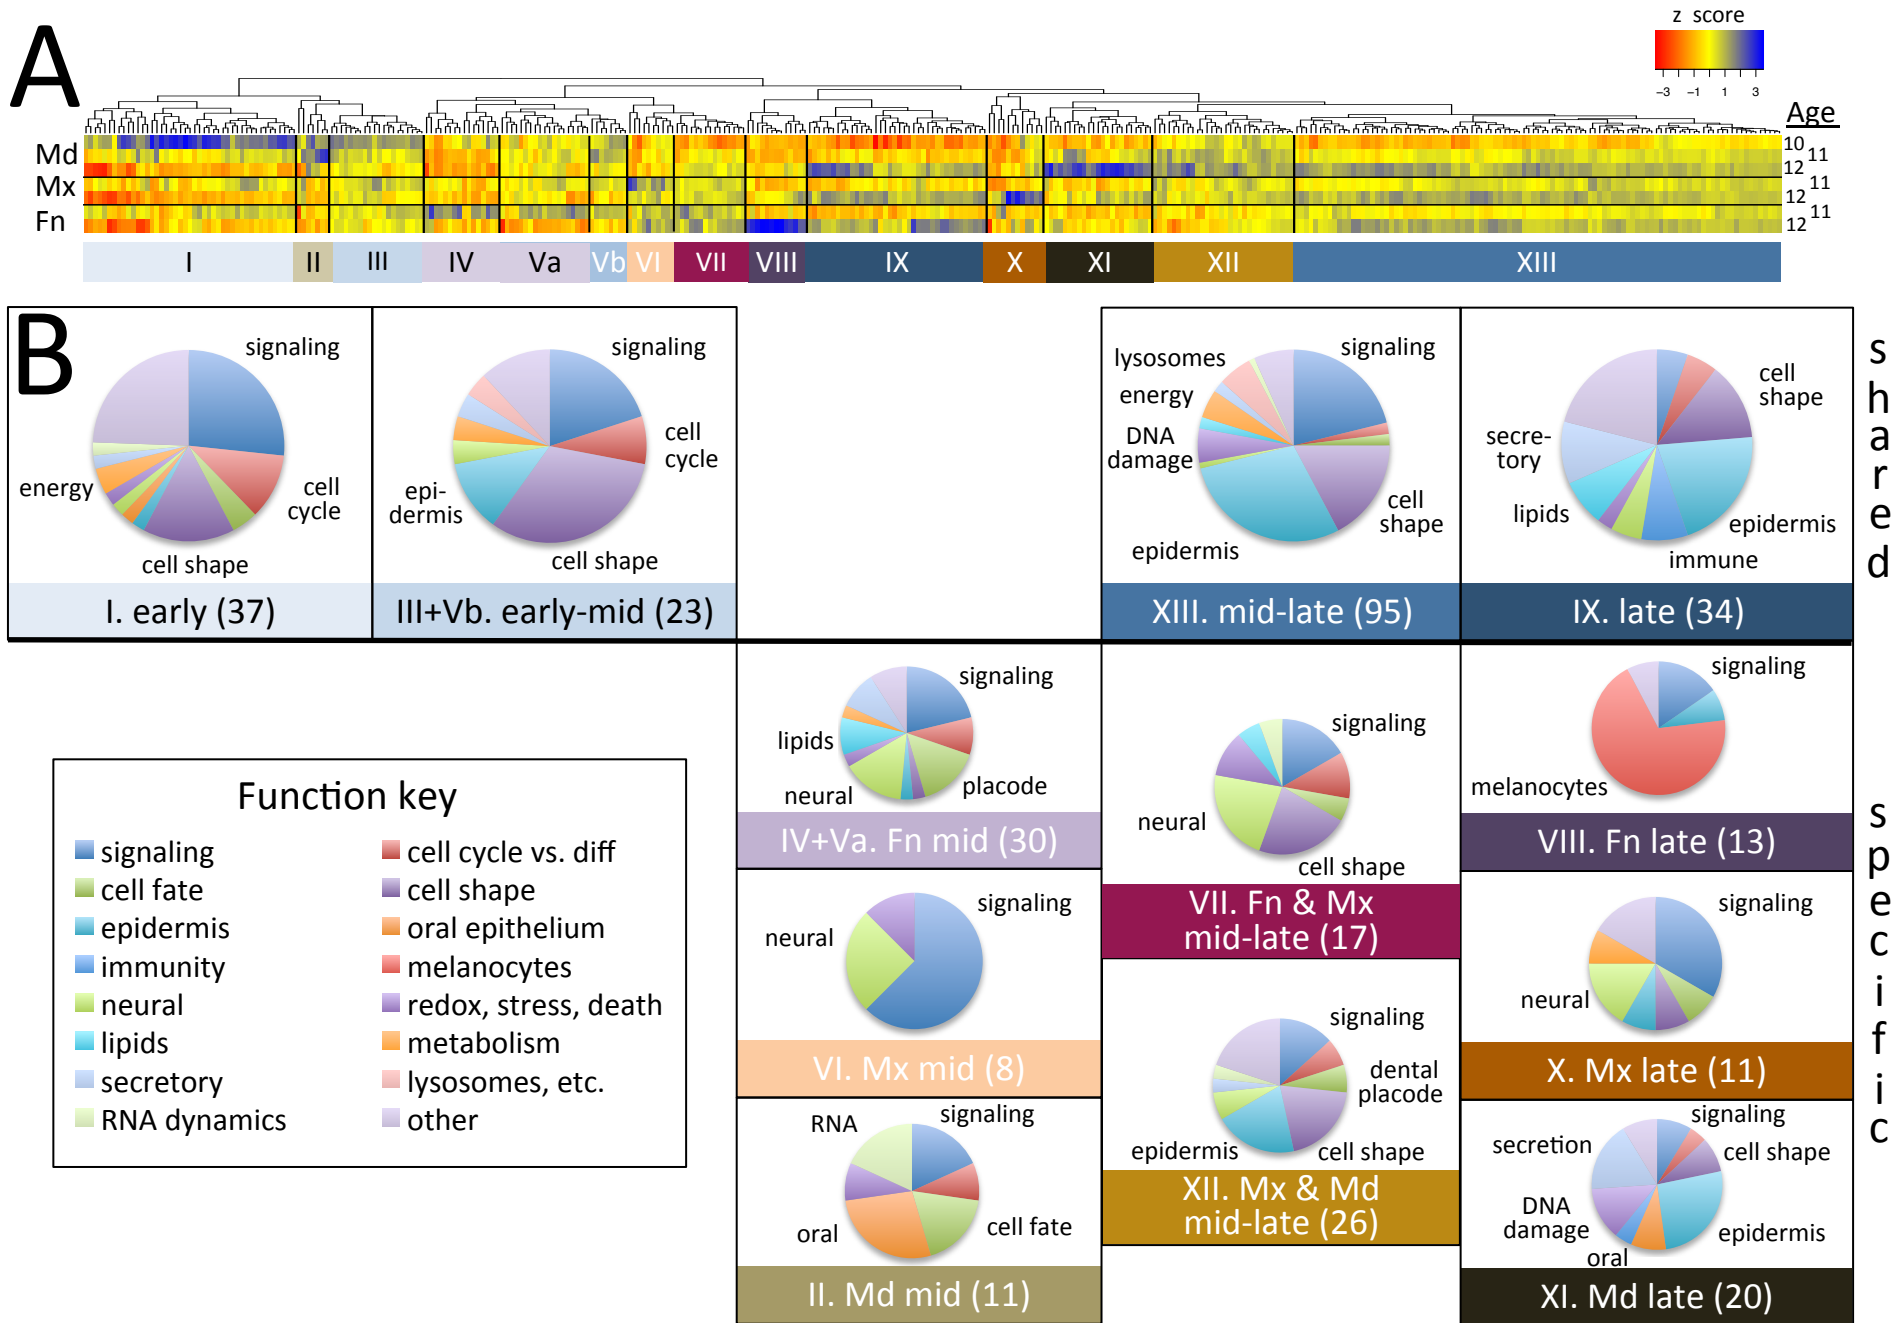

Figure 4



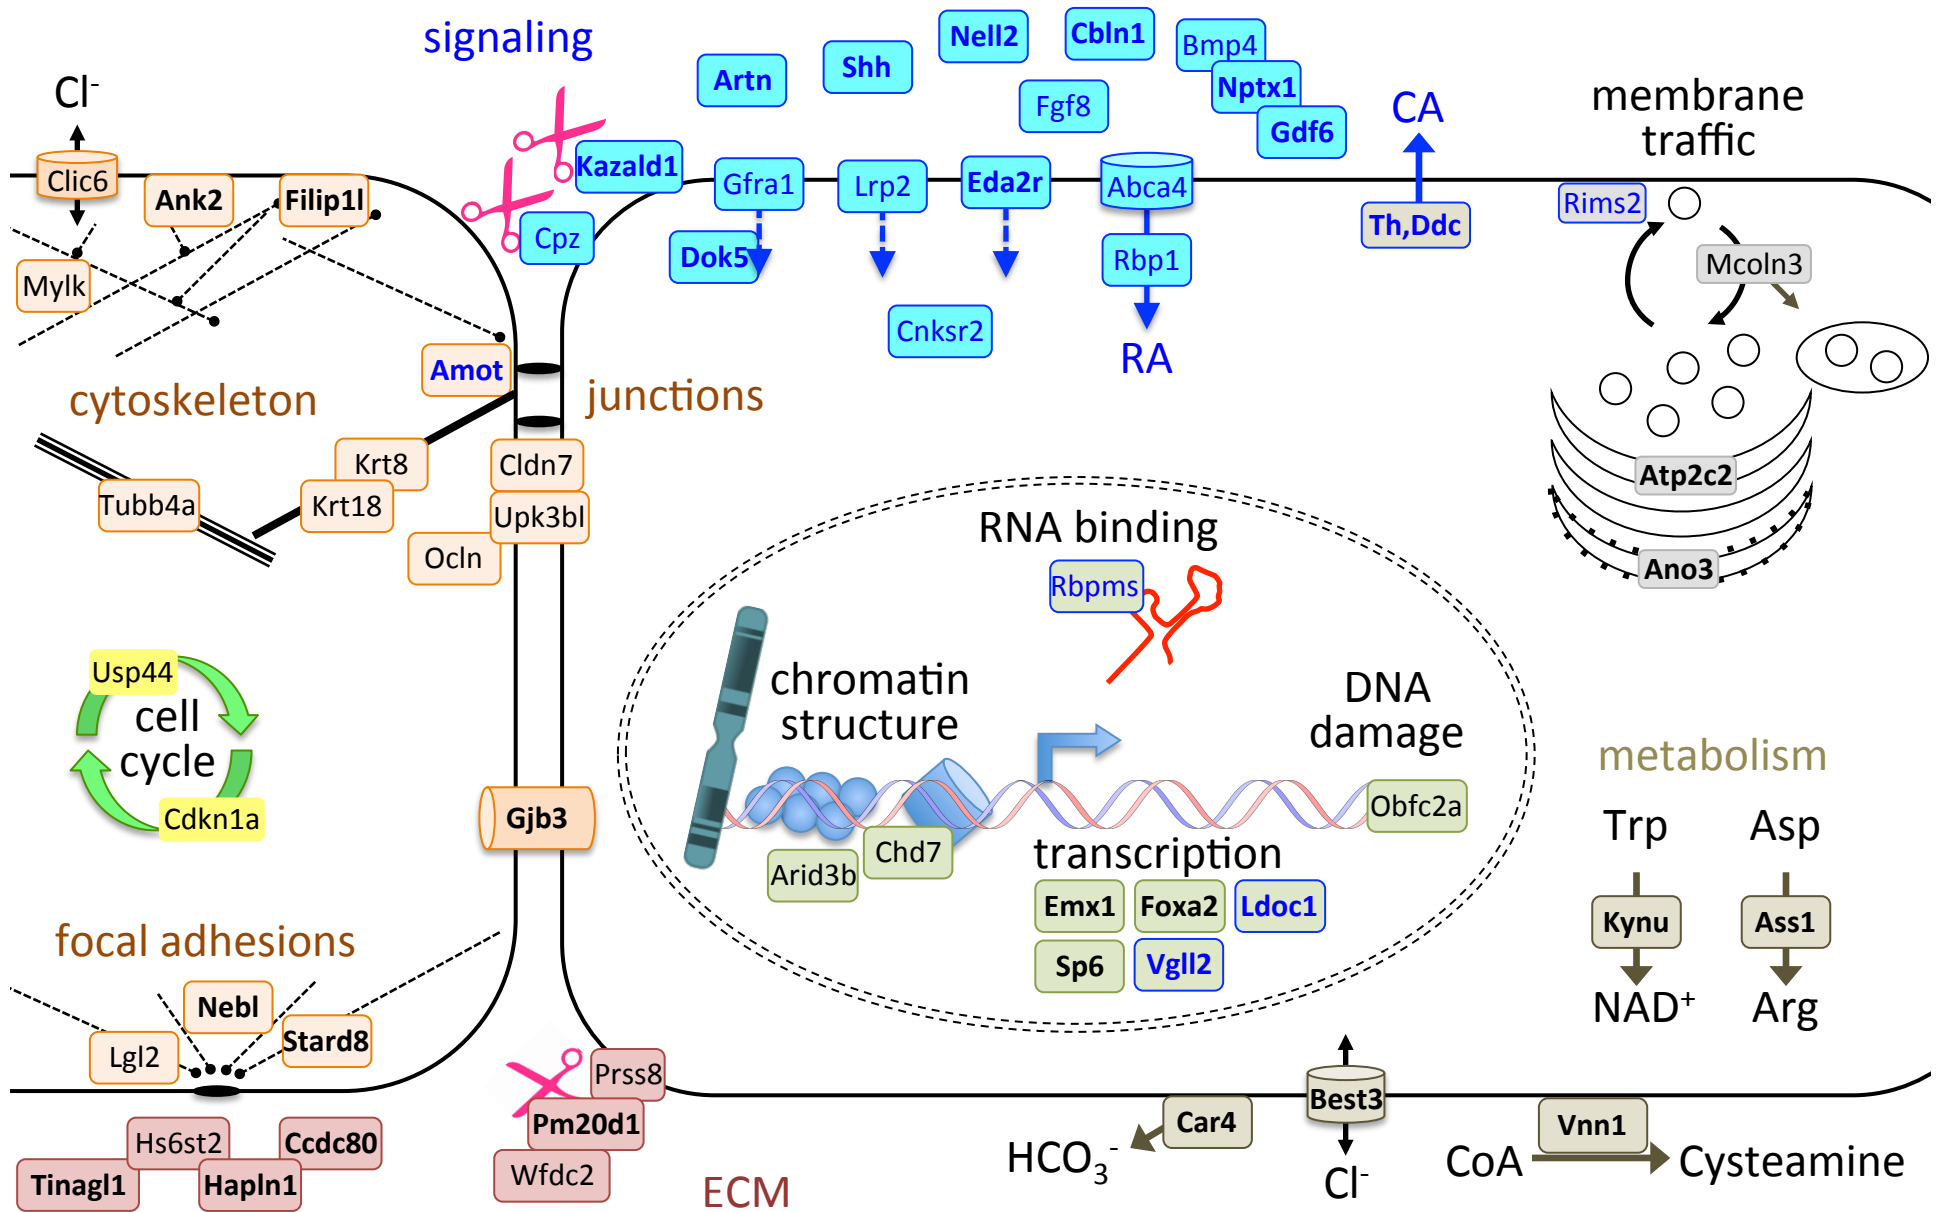

Figure 5

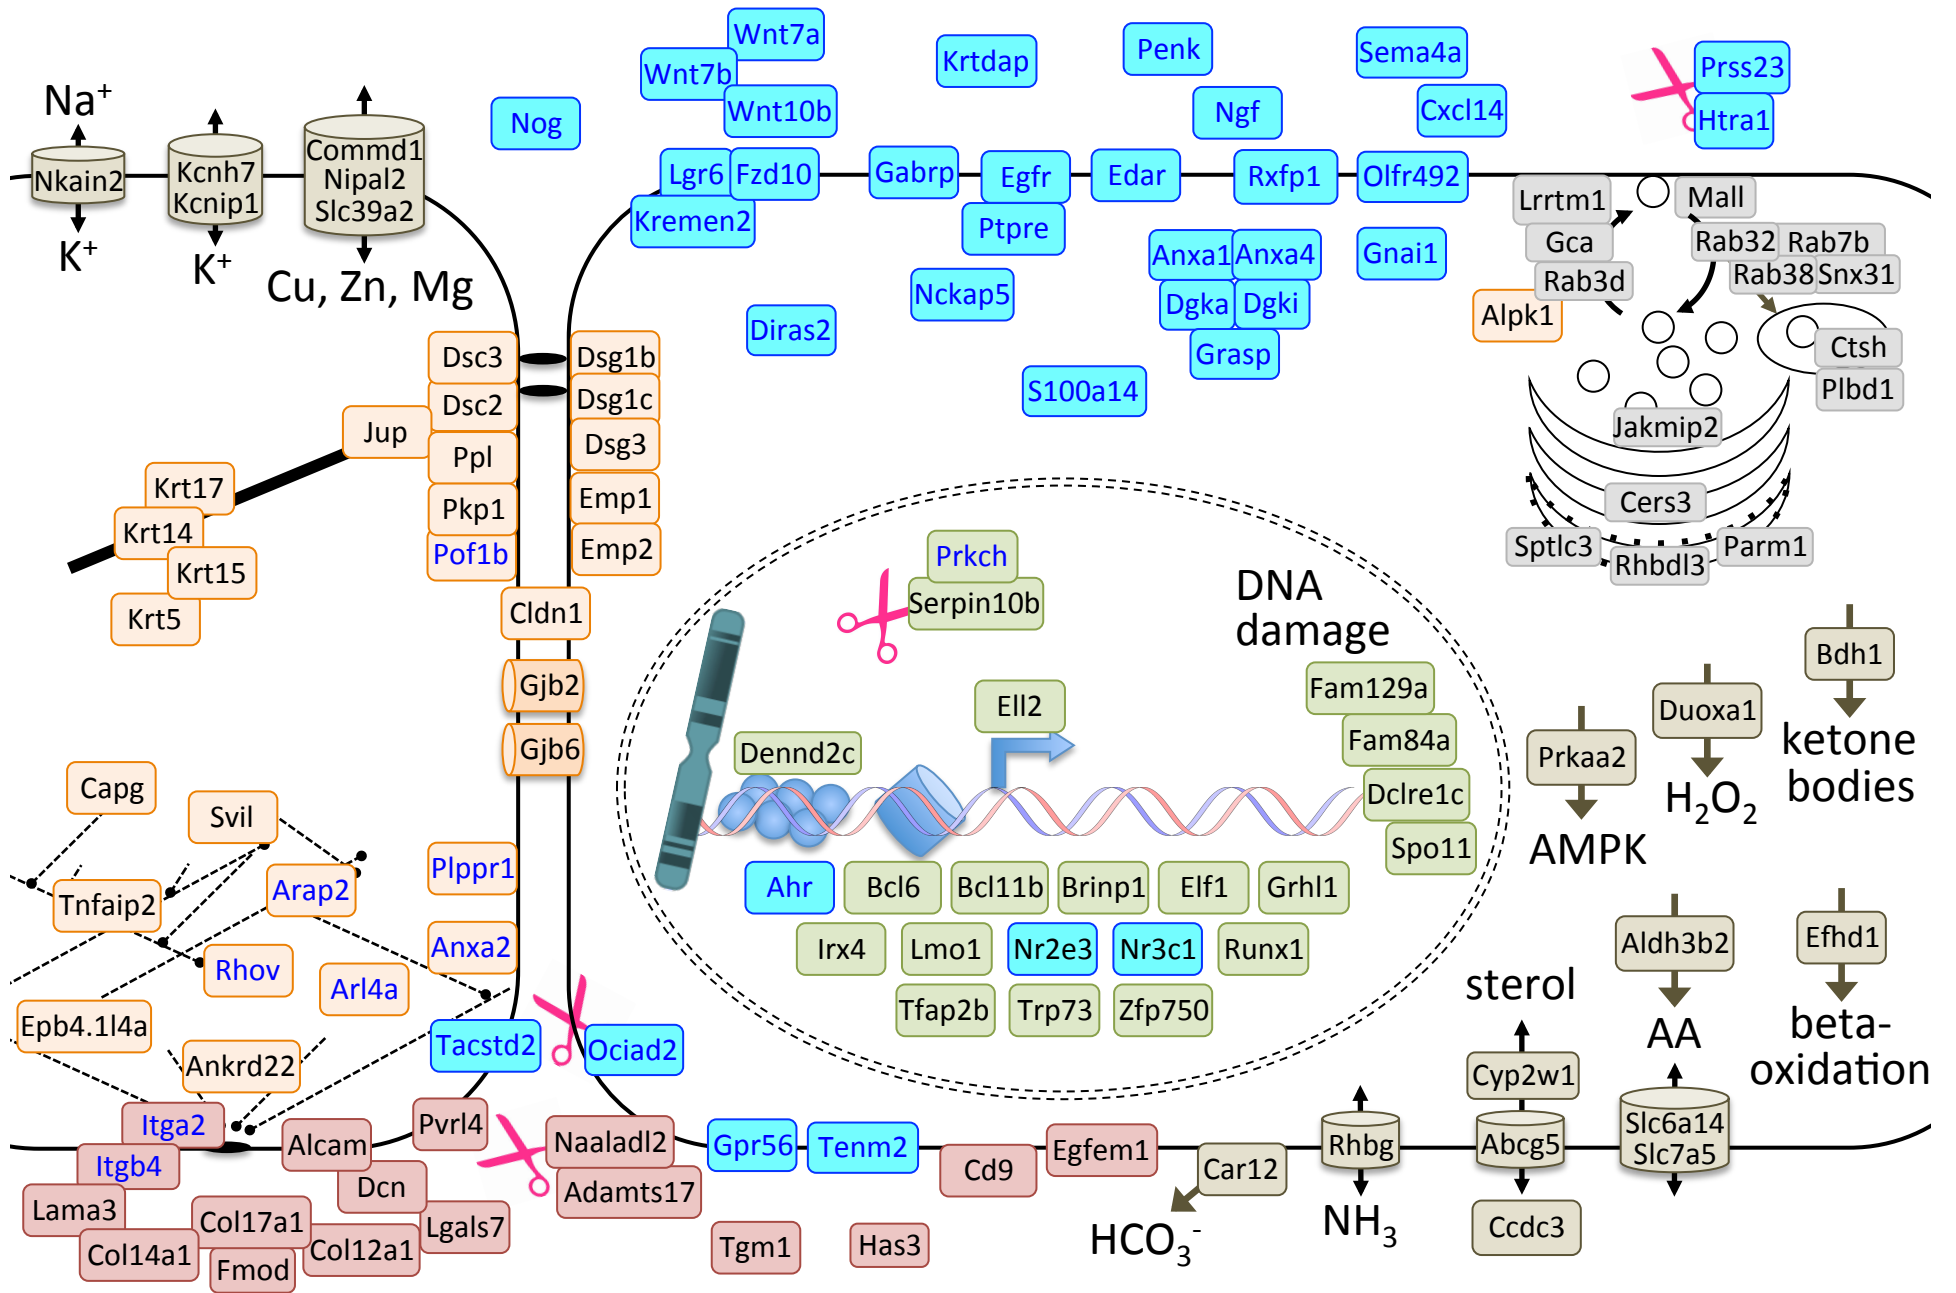

Figure 6

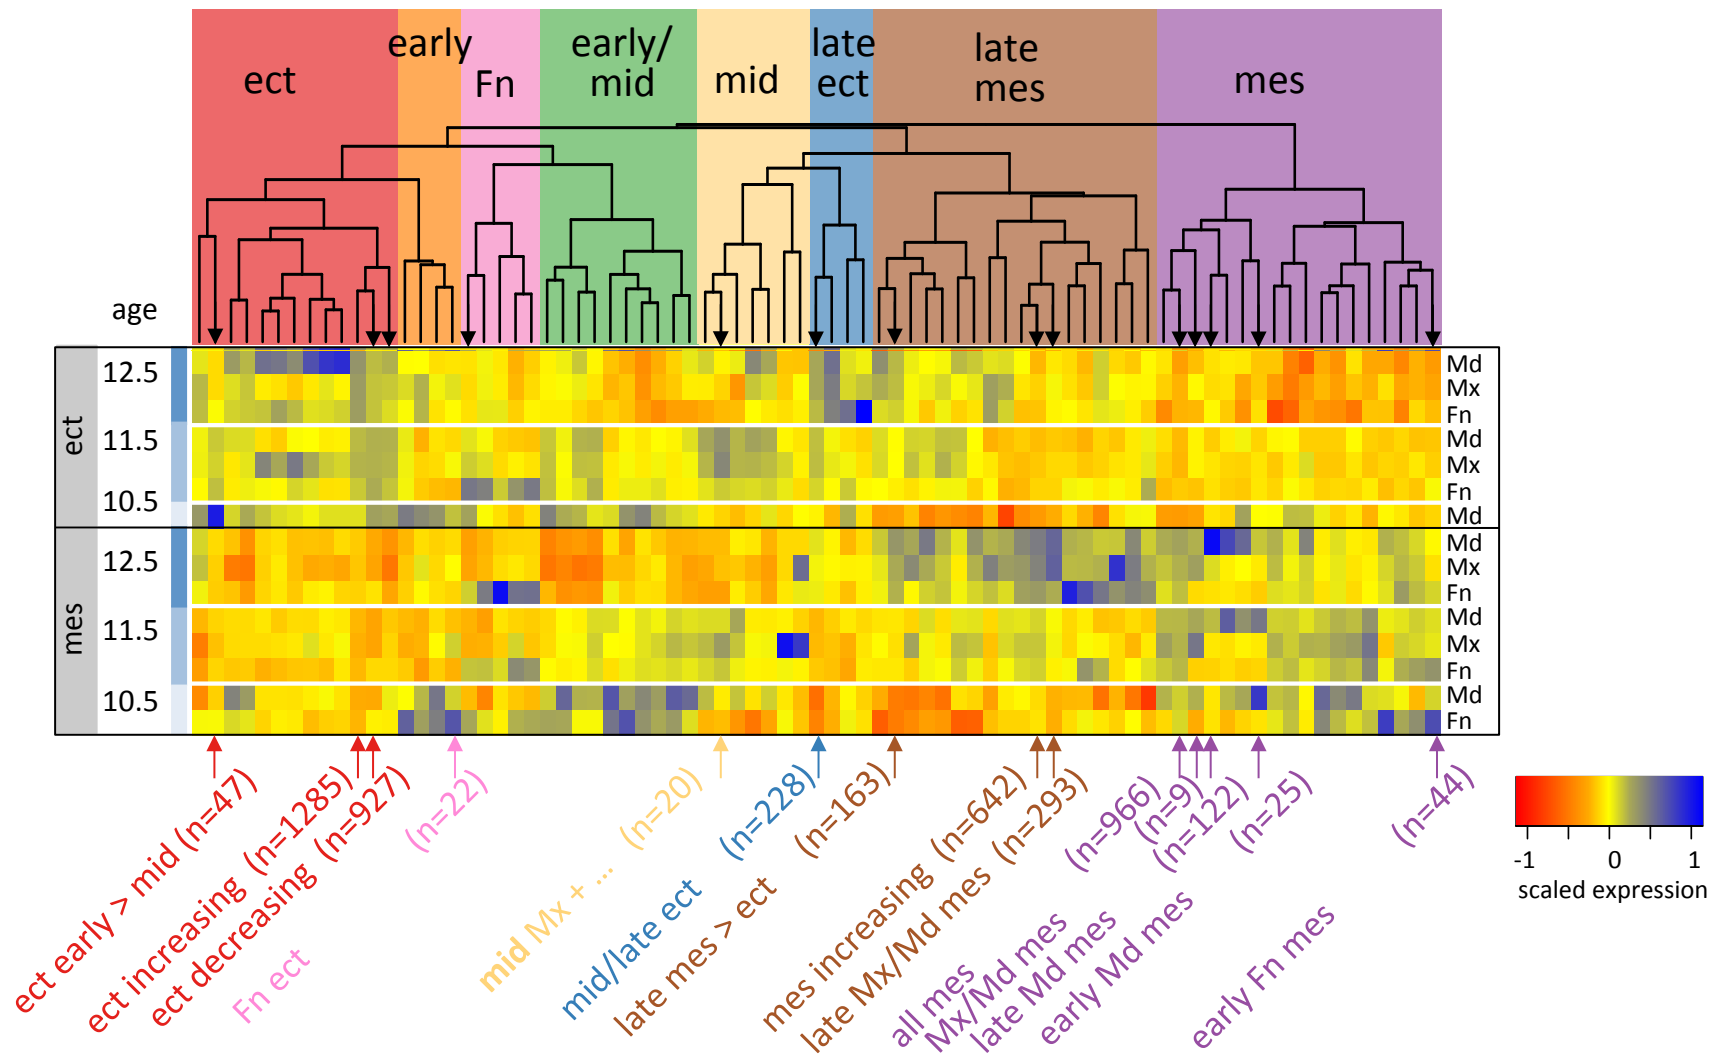

Figure 7

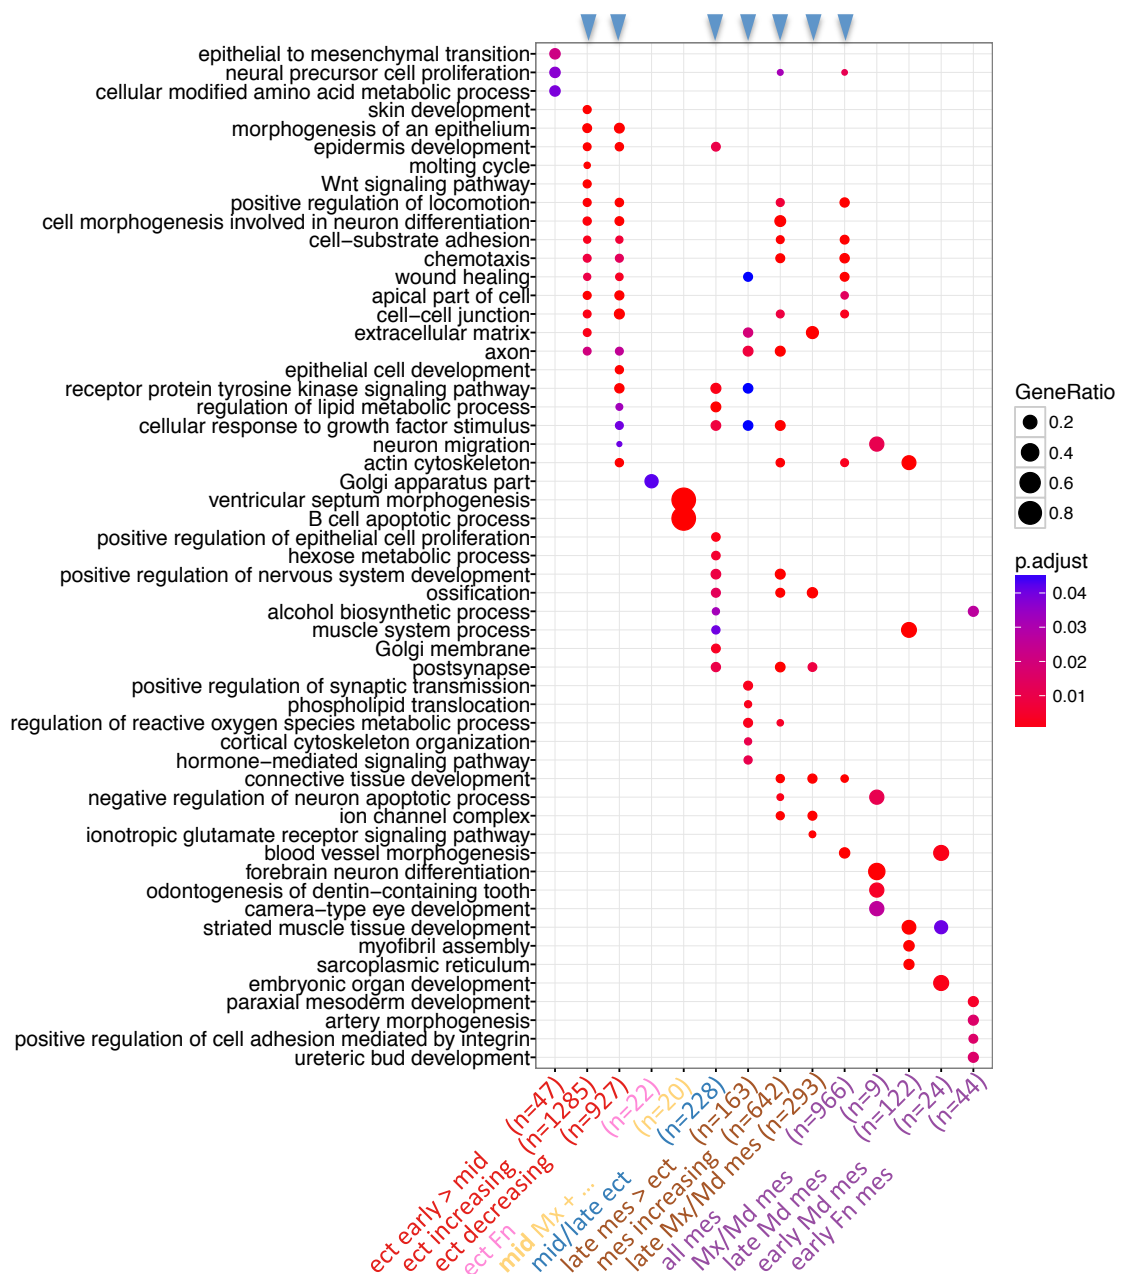

Figure 8



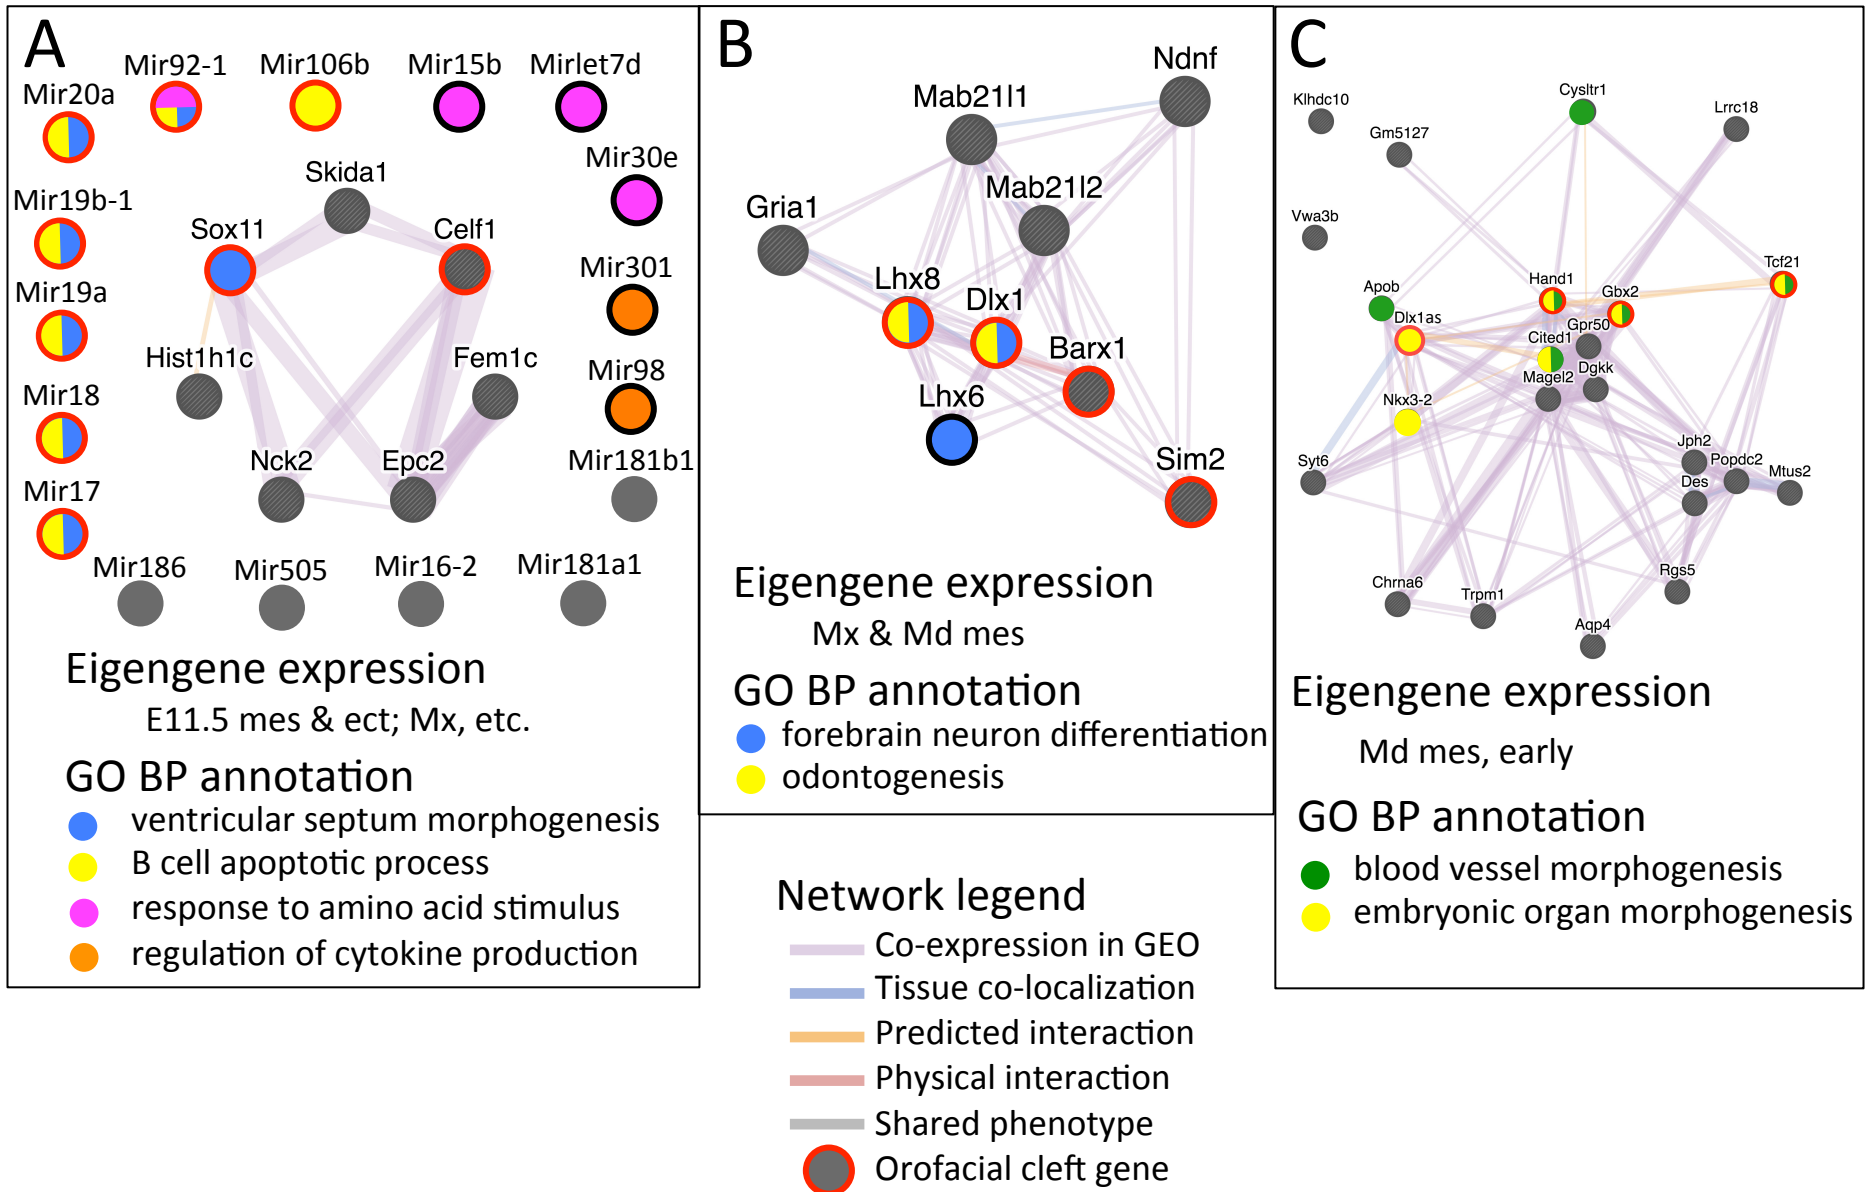

Figure 9
