# Supplementary material
Source: PubMed Central journal article supplement (PMC5530582)
Supplement: NIHMS871374-supplement-8.pdf [file NIHMS871374-supplement-8.pdf]

**Table S6: Gene Expression Database confirmation of differentially expressed genes**

| top 10 in: | Gene           | Interpretation    | most relevant details                                                                                                   | most relevant references (PMID)       |
|------------|----------------|-------------------|-------------------------------------------------------------------------------------------------------------------------|---------------------------------------|
| Ect        | <i>Esrp1</i>   | Epithelial        | many/most epithelia                                                                                                     | 19328061, 23233200, 6371508, 16033648 |
|            | <i>Gabrp</i>   | NA                | adult alveolar epithelial type II cells, breast ductal epithelia                                                        | 15184050, 16187283                    |
|            | <i>Krt14</i>   | Epithelial        | E9.5+ epidermis, epidermal stem cells                                                                                   | 10084315, 24071939, 17631058, 7525178 |
|            | <i>Gjb2</i>    | Epithelial        | E14.5 skin, oral epithelium                                                                                             | 14681479                              |
|            | <i>Krt5</i>    | Epithelial        | E9.5 epidermis, E14.5 oral, nasal epithelia                                                                             | 7525178, 21267068                     |
|            | <i>Perp</i>    | Epithelial        | E14.5 skin, oral epithelium                                                                                             | 21267068                              |
|            | <i>Dsp</i>     | Epithelial        | E9.5 oral endoderm, E13.5 oral epithelium, E14.5 skin, oral epithelium                                                  | 7576135, 16937369, 21267068           |
|            | <i>Cldn6</i>   | Epithelial        | E12.5 epidermis, oral, olfactory epithelium                                                                             | 17182288, 17075866                    |
|            | <i>Fermt1</i>  | Epithelial        | E13.5 oral epithelium, E14.5 also skin, nares                                                                           | 16876785, 21267068                    |
|            | <i>Tacstd2</i> | Epithelial        | E14.5 skin, oral epithelium                                                                                             | 21267068                              |
| Mes        | <i>Gpr50</i>   | NA                | no annotations outside brain and kidney                                                                                 |                                       |
|            | <i>Aspn</i>    | connective tissue | tongue, mandibular and maxillary process; connective tissue primordia                                                   | 11152695                              |
|            | <i>Prrx1</i>   | Mesenchyme        | olfactory placode, postmigratory mesenchyme of facial prominences                                                       | 20059953, 876178                      |
|            | <i>Sult1e1</i> | OE                | E14.5 olfactory epithelium                                                                                              | 14681479                              |
|            | <i>Aldh1a2</i> | NA                | E10.5 1st arch, olfactory pit, E11.5 proximal in maxilla                                                                | 9106168, 11025231, 26238476           |
|            | <i>Frzb</i>    | Mesenchyme        | E11.5 tongue, Maxillia and Mandible primordia, E12.5 face mesenchyme                                                    | 10415363, 9671940                     |
|            | <i>Tnfrsf6</i> | OE?               | E15 mandible, nasal cavity                                                                                              | 8106408                               |
|            | <i>Hbb-bh1</i> | blood             | yolk sac, blood                                                                                                         | 10529424                              |
|            | <i>Ebf1</i>    | OE                | E13.5+ brain, retina, olfactory epithelium                                                                              | 8756438, 10842061                     |
|            | <i>Ogn</i>     | Mesenchyme        | E14.5 bone primordia                                                                                                    | 21267068                              |
| Fn         | <i>Sult1e1</i> | OE                | E14.5 olfactory epithelium                                                                                              | 14681479                              |
|            | <i>Ugt2a1</i>  | OE                | E14.5 olfactory epithelium                                                                                              | 14681479                              |
|            | <i>Cxcl13</i>  | NA                | E11.5 diencephalon                                                                                                      | 16602821                              |
|            | <i>Otx2</i>    | OE                | E10.5 oral & olfactory epithelia                                                                                        | 7588062, 8887325                      |
|            | <i>Tfap2b</i>  | OE                | E10.5 1st arch, E11.5 maxillary process, E14.5 nasal cavity                                                             | 20059953, 21267068                    |
|            | <i>Fezf1</i>   | OE                | E14.5 internal and external nares, olfactory epithelium                                                                 | 19222525, 21267068                    |
|            | <i>Fstl5</i>   | NA                | in adult olfactory bulb. no annotation in face or embryo                                                                | 24588779                              |
|            | <i>Aldh1a3</i> | olfactory pit     | E10.5 olfactory pit, E11.5 olfactory epithelium                                                                         | 10906479, 19700620, 11044606          |
|            | <i>Acsf4</i>   | OE                | E14.5 olfactory epithelium                                                                                              | 21267068, 14681479                    |
|            | <i>Cldn6</i>   | OE                | E12.5 epidermis, oral, olfactory epithelium                                                                             | 17182288, 17075866                    |
| Mx         | <i>Actc1</i>   | Mx & Md           | E11.5, E12.5 mesenchyme near the juncture of the maxillary process and the mandibular arch, mastication muscles, tongue | 1794310, 8404540                      |
|            | <i>Tbx15</i>   | Mx                | E10.5 1st arch, E11.5 maxillary process                                                                                 | 9693034, 20059953, 21267068           |
|            | <i>Dlx1</i>    | Mx                | E10.5 1st arch maxillary component                                                                                      | 11180832                              |
|            | <i>Tbx18</i>   | Mx                | E11.5 maxillary process                                                                                                 | 20059953                              |
|            | <i>Stmn2</i>   | Mx vibrissae?     | E10.5 nasal pit, E11.5 olfactory epithelium, E14.5 also tongue, vibrissae                                               | 10804175, 21267068                    |
|            | <i>Lhx8</i>    | Mx & Md           | oral/odontogenic mesenchyme<br>E9.5 maxillary ectoderm, E10.5 1st arch maxillary component, E14.5 tooth buds            | 9570771, 14681479                     |
|            | <i>Cyp26c1</i> | Mx                |                                                                                                                         | 12915310                              |
|            | <i>Lhx6</i>    | Mx & Md           | oral/odontogenic mesenchyme                                                                                             | 9570771, 14681479                     |
|            | <i>Nefm</i>    | Mx                | E10.5-11 trigeminal ganglia and nerve (maxillary division)                                                              | 18246078                              |
|            | <i>Sim2</i>    | Mx and/or Md?     | E10.5 branchial arch                                                                                                    | 12466854                              |
| Md         | <i>Gpr50</i>   | NA                | no annotations outside brain and kidney                                                                                 |                                       |
|            | <i>Actc1</i>   | Mx & Md           | E11.5, E12.5 mesenchyme near the juncture of the maxillary process and the mandibular arch, mastication muscles, tongue | 1794310, 8404540                      |
|            | <i>Myh3</i>    | tongue muscle     | E11.5 facial muscle, E14.5 tongue muscle                                                                                | 9808779, 21267068                     |
|            | <i>Acta2</i>   | arteries          | E10.5 yolk sac, arteries                                                                                                | 11807029                              |
|            | <i>Zcchc5</i>  | tongue muscle     | E14.5 tongue muscles                                                                                                    | 21267068                              |
|            | <i>Dlx1as</i>  | NA                | subventricular zone                                                                                                     | 9415433                               |
|            | <i>Tnnc1</i>   | tongue muscle     | E11-13 tongue muscles                                                                                                   | 10669094                              |
|            | <i>Sfrp4</i>   | Mx & Md?          | E14.5 tongue, lower jaw, salivary gland, tooth, palatal shelf, etc                                                      | 14681479                              |
|            | <i>Mab2111</i> | OE, Md, Mx        | E10.5 Md, E12.5 olfactory epithelium, maxillary process                                                                 | 10349626, 24780627                    |
|            | <i>Pitx1</i>   | tongue/teeth      | epithelia of the tongue, palate, teeth, olfactory system, Rathke's pouch                                                | 9226452                               |

NA: no information discovered relevant to which prominence or tissue layer in the developing face

Expression patterns for the top 10 (by fold change) genes enriched in Mes, Ect, FnP, MxP and MdP (Tables S2-4) were searched in the Gene Expression Database (<http://www.informatics.jax.org/expression.shtml>). Genes with limited information in GXD were also searched through PubMed. The most relevant references, anatomical expression details and our interpretation of how that supports the microarray data are shown. Note that the FnP mesenchyme included the invaginating olfactory epithelium (OE).
