# Supplementary material
Source: PubMed Central journal article supplement (PMC5530582)
Supplement: NIHMS871374-supplement-10.pdf [file NIHMS871374-supplement-10.pdf]

**Table S8. Pan-Ectodermal gene functions based on enrichment of Gene Ontology Biological Process Terms**

| Gene ontology term (gene count)                          | Enrichment | P.adjust | Gene ontology term (gene count)                                       | Enrichment | P.adjust |
|----------------------------------------------------------|------------|----------|-----------------------------------------------------------------------|------------|----------|
| <b>epithelial morphogenesis &amp; development (104)</b>  |            |          | <b>adhesion &amp; motility (98)</b>                                   |            |          |
| epithelium development (36)                              | 3.3        | 7.04E-07 | cell adhesion (65)                                                    | 2.9        | 5.98E-11 |
| tissue morphogenesis (32)                                | 3.3        | 2.66E-06 | cell-cell adhesion (32)                                               | 3.4        | 3.25E-06 |
| tube development (32)                                    | 3.0        | 2.30E-05 | regulation of cell adhesion (14)                                      | 3.7        | 5.66E-03 |
| gland development (26)                                   | 3.3        | 7.69E-05 | calcium-independent cell-cell adhesion (7)                            | 7.6        | 1.09E-02 |
| morphogenesis of a branching structure (19)              | 3.8        | 3.26E-04 | homophilic cell adhesion (15)                                         | 3.2        | 1.15E-02 |
| cell morphogenesis (32)                                  | 2.6        | 3.26E-04 | cell motion (32)                                                      | 2.2        | 5.17E-03 |
| regulation of cell morphogenesis (16)                    | 4.1        | 7.43E-04 | cell migration (22)                                                   | 2.3        | 2.34E-02 |
| epithelial cell differentiation (18)                     | 3.6        | 8.40E-04 | extracellular structure organization (16)                             | 2.7        | 2.81E-02 |
| morphogenesis of a polarized epithelium (6)              | 13.5       | 2.89E-03 | <b>signaling (151)</b>                                                |            |          |
| epidermis development (17)                               | 3.4        | 2.88E-03 | intracellular signaling cascade (72)                                  | 2.0        | 1.71E-05 |
| cell morphogenesis involved in differentiation (21)      | 2.5        | 1.57E-02 | regulation of kinase activity (21)                                    | 2.7        | 5.75E-03 |
| regulation of morphogenesis of a branching structure (7) | 7.0        | 1.61E-02 | enzyme linked receptor protein signaling pathway (26)                 | 2.4        | 6.25E-03 |
| keratinocyte proliferation (5)                           | 12.4       | 1.87E-02 | cell-cell signaling (27)                                              | 2.3        | 6.32E-03 |
| morphogenesis of embryonic epithelium (11)               | 3.5        | 3.07E-02 | regulation of Ras protein signal transduction (19)                    | 2.6        | 1.59E-02 |
| odontogenesis (12)                                       | 6.6        | 1.86E-04 | negative regulation of signal transduction (18)                       | 2.6        | 2.02E-02 |
| hair follicle development (10)                           | 5.0        | 7.60E-03 | establishment of planar polarity (4)                                  | 19.9       | 2.17E-02 |
| <b>neural development (66)</b>                           |            |          | regulation of phosphorylation (25)                                    | 2.1        | 2.30E-02 |
| regulation of nervous system development (21)            | 3.5        | 2.68E-04 | transmembrane receptor protein tyrosine kinase signaling pathway (19) | 2.5        | 2.40E-02 |
| neuron differentiation (36)                              | 2.2        | 1.20E-03 | positive regulation of catalytic activity (23)                        | 2.2        | 2.64E-02 |
| cell projection organization (28)                        | 2.2        | 1.05E-02 | Wnt receptor signaling pathway, calcium modulating pathway (6)        | 7.5        | 2.84E-02 |
| sensory organ development (24)                           | 2.3        | 1.28E-02 | protein amino acid phosphorylation (43)                               | 1.7        | 3.27E-02 |
| <b>other development (77)</b>                            |            |          | negative regulation of cell communication (18)                        | 2.4        | 3.55E-02 |
| mesoderm development (10)                                | 4.2        | 2.00E-02 | Wnt receptor signaling pathway (14)                                   | 2.7        | 5.04E-02 |
| embryonic morphogenesis (29)                             | 2.0        | 2.22E-02 | <b>regulation of growth &amp; proliferation (70)</b>                  |            |          |
| embryonic organ development (21)                         | 2.2        | 4.41E-02 | regulation of cell proliferation (48)                                 | 2.2        | 8.08E-05 |
| cell fate commitment (16)                                | 2.7        | 2.62E-02 | negative regulation of cell differentiation (22)                      | 3.0        | 1.25E-03 |
| negative regulation of cell development (8)              | 5.0        | 2.85E-02 | regulation of developmental growth (8)                                | 5.4        | 2.13E-02 |
| positive regulation of developmental process (20)        | 2.3        | 2.95E-02 | regulation of cell growth (12)                                        | 3.2        | 3.13E-02 |
| vasculature development (22)                             | 2.2        | 3.22E-02 |                                                                       |            |          |
| <b>other (76)</b>                                        |            |          |                                                                       |            |          |
| sulfur metabolic process (12)                            | 3.2        | 3.56E-02 |                                                                       |            |          |
| phosphate metabolic process (54)                         | 1.5        | 3.72E-02 |                                                                       |            |          |

547 of 858 pan-Ectodermal genes were associated with Biological Process GO terms. 310 were associated with enriched terms. Fold enrichment and P.adjust (P-value, with Benjamini adjustment for multiple testing) were determined using DAVID analysis. All enriched terms (p.adjust < 0.05) are reported here, after grouping by genes and eliminating redundant terms.
